# 1    **Developmental genetics of corolla tube formation: role of the tasiRNA-ARF** 2    **pathway**

3

4    Baoqing Ding<sup>1\*</sup>, Rui Xia<sup>2,3</sup>, Vandana Gurung<sup>1</sup>, Janelle M. Sagawa<sup>1</sup>, Lauren E. Stanley<sup>1</sup>,  
5    Matthew Strobel<sup>1</sup>, Qiaoshan Lin<sup>1</sup>, Pamela K. Diggle<sup>1</sup>, Blake C. Meyers<sup>3,4</sup>, Yao-Wu  
6    Yuan<sup>1,5,\*</sup>

7

8    <sup>1</sup>Department of Ecology and Evolutionary Biology, University of Connecticut, Storrs, CT  
9    06269, USA

10    <sup>2</sup>State Key Laboratory for Conservation and Utilization of Subtropical Agro-Bioresources,  
11    South China Agricultural University, Guangzhou, Guangdong 510642, China

12    <sup>3</sup>Donald Danforth Plant Science Center, St. Louis, MO 63132, USA

13    <sup>4</sup>Division of Plant Sciences, University of Missouri–Columbia, Columbia, MO 65211,  
14    USA

15    <sup>5</sup>Institute for Systems Genomics, University of Connecticut, Storrs 06269, USA

16

17    \*Corresponding authors:

18    Baoqing Ding, Department of Ecology and Evolutionary Biology, University of  
19    Connecticut, Storrs, CT, 06269; Phone: 860-486-4154; Email: [ding.baoqing@gmail.com](mailto:ding.baoqing@gmail.com)

20    Yao-Wu Yuan, Department of Ecology and Evolutionary Biology, University of  
21    Connecticut, Storrs, CT, 06269; Phone: 860-486-3469 Email: [yuan.colreeze@gmail.com](mailto:yuan.colreeze@gmail.com)

22

## Abstract

More than 80,000 angiosperm species produce flowers with petals fused into a corolla tube (i.e., sympetalous flowers). As an important element of the tremendous diversity of flower morphology, the corolla tube plays a critical role in many specialized interactions between plants and animal pollinators (e.g., beetles, hawkmoths, hummingbirds, nectar bats), which in turn drives rapid plant speciation. Despite its clear significance in plant reproduction and evolution, the corolla tube remains one of the least understood plant structures from a developmental genetics perspective. Through mutant analyses and transgenic experiments, here we show that the tasiRNA-ARF pathway is required for corolla tube formation in the monkeyflower species *Mimulus lewisii*. Loss-of-function mutations in the *M. lewisii* orthologs of *ARGONAUTE7* and *SUPPRESSOR OF GENE SILENCING 3* cause a dramatic decrease in abundance of TAS3-derived small RNAs and a moderate up-regulation of *AUXIN RESPONSE FACTOR 3* (*ARF3*) and *ARF4*, which lead to inhibition of lateral expansion of the bases of petal primordia and complete arrest of the upward growth of the inter-primordial regions, resulting in unfused corollas. Importantly, by integrating the molecular and phenotypic analyses of the tasiRNA-ARF pathway in *Mimulus* with historical insights from morphological and anatomical studies in various sympetalous species, we propose a new conceptual model for the developmental genetic control of corolla tube formation. This model offers logical connections among the sporadic previous reports of corolla tube mutants in other species and makes clear predictions that can be readily tested using the *Mimulus* system.

## Introduction

About one third of the ~275,000 angiosperm species produce flowers with petals fused into a corolla tube (i.e., sympetalous), forming a protective enclosure of nectaries and reproductive organs. Corolla tubes have evolved multiple times independently across the angiosperm tree of life (1), most notably in the common ancestor of the Asterids, a clade containing more than 80,000 species (2). Subsequent elaboration in length, width, and curvature has led to a great variety of corolla tube shapes that enabled asterid species to exploit many specialized pollinator groups (e.g., beetles, hawkmoths, hummingbirds, nectar bats), which in turn drives rapid plant speciation (3-6). As such, the corolla tube

has long been considered a key morphological innovation that contributed to the radiation of the Asterids (1). Despite its critical importance in the reproductive success and evolution of such a large number of species, the corolla tube remains one of the least understood plant structures from a developmental genetics perspective (7, 8).

Historically, corolla tube formation has been the subject of extensive morphological and anatomical studies (9-19). In particular, numerous studies have described the detailed ontogenetic process of corolla tube development in one subgroup of the asterid clade, the Lamiids, which contains some classical plant genetic model systems such as snapdragon (*Antirrhinum*), petunia (*Petunia*), and morning glory (*Ipomoea*) (11-16, 20-22). A common theme emerging from these studies is that during the early stage of petal development, petal primordia are initiated separately, followed by rapid extension of the petal bases toward the inter-primordial regions, which also grow coordinately, causing congenital “fusion” of the petal primordia and formation of the corolla tube. Little is known, however, about the genetic control of this early-phase lateral extension or the nature of the coordinated inter-primordial growth.

To date only a few genes have been implicated in corolla tube formation. Loss-of-function alleles of the *FEATHERED* gene in Japanese morning glory (*Ipomoea nil*) and the *MAEWEST* gene in petunia (*Petunia x hybrida*), both generated by transposon insertions, result in unfused corollas (23, 24). *FEATHERED* and *MAEWEST* encode KANADI and WOX transcription factors, and their *Arabidopsis* orthologs are *KANADII* and *WOXI*, respectively. In addition, ectopic expression of the *Arabidopsis* TCP5 protein fused with a repressor motif in *Ipomoea* also disrupted corolla tube formation (25). However, whether the endogenous *TCP5* ortholog in *Ipomoea* is involved in corolla tube development is unclear. More recently, it was reported that transient knock-down of the *Petunia* NAC-transcription factors *NAM* and *NH16* via virus-induced gene silencing (VIGS) also caused decreased petal fusion (26), but the interpretation of this result was confounded by the observation that occasional flowers produced on the “escape shoots” of the loss-of-function *nam* mutants have normal corolla tubes (27). The fact that these genes were characterized from different plant systems and through different methods (transposon insertion alleles, heterologous expression of chimeric repressor, and VIGS)

makes it challenging to interpret their genetic relationships and their precise functional roles in corolla tube formation.

One way to overcome this problem is to systematically analyze corolla tube mutants in a single model system. To this end, we have employed a new genetic model system, the monkeyflower species *Mimulus lewisii*, mainly for its ease in chemical mutagenesis and *Agrobacterium*-mediated *in planta* transformation (28, 29). *M. lewisii* is a typical bumblebee-pollinated species with a conspicuous corolla tube (Fig. 1A). Through ethyl methanesulfonate (EMS) mutagenesis, we have generated a dozen recessive mutants (named *flayed*) with split corolla tubes. Here we report the characterization of one group of mutants, caused by loss-of-function mutations in two genes that are required for the biogenesis of *trans*-acting short interfering RNAs (tasiRNAs).

Among the tasiRNA loci characterized to date, *TAS3* is the most widely conserved, found in virtually all land plants (30). *TAS3* transcript bears two binding sites for miR390, which triggers the production of phased tasiRNAs, including the highly conserved “tasiARF” that targets *AUXIN RESPONSE FACTOR 3* (*ARF3*) and *ARF4* (31, 32). This tasiRNA-ARF regulatory module has been shown to play a critical role in leaf polarity and blade expansion (i.e., lamina growth) in both eudicots (33-38) and monocots (39-41). Consistent with previous studies, here we demonstrate that in the *M. lewisii* mutants, *TAS3*-derived tasiRNAs decrease dramatically in abundance and *MIARF3* and *MIARF4* expression are upregulated. Importantly, we show that malfunction of the tasiRNA-ARF pathway in the *M. lewisii* mutants impedes the early lateral expansion of the petal primordium bases and the coordinated inter-primordial growth, consequently preventing the congenital fusion of the petal primordia. Integrating our molecular and phenotypic analyses of the tasiRNA-ARF pathway in *Mimulus* with historical insights from morphological and anatomical studies of various sympetalous species, we propose a new conceptual model for the genetic control of corolla tube formation, which offers logical connections among the sporadic previous reports of corolla tube mutants and makes clear predictions that can be readily tested using the *Mimulus* system.

## Results and Discussion

**Phenotypic Characterization of the *flayed1* and *flayed2* Mutants.** Three of the recessive mutants recovered from EMS mutagenesis using the inbred line LF10, *flayed1*-*flayed3*, are morphologically indistinguishable. Pair-wise crosses suggested that they belong to two complementation groups, *flayed1* and *flayed2* (*flayed3* is allelic to *flayed2*) (Fig. 1B and C). In addition to having unfused petals, these mutants display carpel fusion defects, with phenotypes varying from flower to flower within the same plant. Most mutant flowers have two fused carpels, as in the wild-type, but have partially split stigmas with more than two lobes (Fig. 1E). Less frequently there are flowers with two almost completely separate styles. The length of mutant pistils is also reduced compared to the wild-type (Fig. 1E). No obvious phenotypes were observed in the stamens of these mutants.

Another notable feature of the *flayed1/2* mutants is the reduced width of lateral organs. The dorsal and lateral petals show ~30% decrease in width compared to the wild-type, and the ventral petal shows ~37% decrease (Fig. 1F; Table S1). Leaf width is also substantially reduced (by ~40%) in the mutants, but leaf length is unaffected (Fig. 1G and H; Table S1). To determine whether the reduction in petal width is due to change in cell number, cell size, or both, we measured the width of abaxial epidermal cells of the dorsal petal lobe for both the wild-type and the *flayed2* mutant. Because the petal lobe abaxial epidermal cells are irregularly shaped (Fig. 1I), the width measurements were done on five contiguous cells to account for the variation among individual cells within the same sample. No significant difference in cell width was found between the wild-type and *flayed2* (Fig. 1J), which suggests that the difference in petal width between the mutant and the wild-type is primarily due to difference in cell number (i.e., number of cell divisions).

Unlike the morning glory mutant *feathered* (23) or the petunia mutant *maewest* (24), *flayed1/2* do not show any defects in tissue adaxial-abaxial polarity. Instead, the *flayed1/2* mutants closely resemble the petunia mutant *choripetala suzaane* (*chsu*), which also has a split corolla tube, variable carpel fusion defects, and narrower leaf with normal adaxial/abaxial polarity. Unfortunately, the molecular identity of *CHSU* is still unknown.

***FLAYED1* and *FLAYED2* Are the Orthologs of Arabidopsis *AGO7* and *SGS3*, Respectively.** To identify the causal genes of *flayed1* and *flayed2*, we analyzed each mutant using a genomic approach that combines the advantages of bulk segregant analysis and comparison of single nucleotide polymorphism (SNP) profiles between multiple EMS mutants (*Materials and Methods*), as demonstrated in a previous study (42). We narrowed the causal mutation of *flayed1* and *flayed2* down to 38 and 19 candidate SNPs, respectively (Table S2 and S3). The vast majority of these SNPs locate in non-coding, repetitive sequences, with only two or three mutations resulting in amino acid changes in each mutant (Table S2 and S3). Notably, in both *flayed1* and *flayed2*, there is one mutation leading to a premature stop codon, in the ortholog of Arabidopsis *ARGONAUTE7* (*AGO7*) and *SUPPRESSOR OF GENE SILENCING 3* (*SGS3*), respectively (Fig. 2A and B; Table S2 and S3). *AGO7* and *SGS3* are part of the same tasiRNA biogenesis pathway (43-45), which would explain the indistinguishable mutant phenotypes of *flayed1* and *flayed2*. Furthermore, sequencing the coding DNA (CDS) of *MISGS3* in *flayed3*, which is allelic to *flayed2*, revealed an independent mutation that also leads to a premature stop codon (Fig. 2B). Together, these results suggested that *MIAGO7* and *MISGS3* were the most promising candidate genes for *FLAYED1* and *FLAYED2*, respectively.

To verify gene identities, full-length CDS of *MIAGO7* and *MISGS3* were introduced to the *flayed1* and *flayed2* mutant background, respectively, driven by the cauliflower mosaic virus 35S promoter. Among the 29 independent 35S:*MIAGO7* lines in the *flayed1* background, 13 showed a fully rescued phenotype that is indistinguishable from the wild-type; four lines showed a partially rescued phenotype, with petal width increased to wild-type level but the petals remained unfused (Fig. 2C). Similarly, six of the 18 *MISGS3* over-expression lines in the *flayed2* background displayed a fully rescued phenotype and two displayed a partially rescued phenotype (Fig. 2D). qRT-PCR assessment of *MIAGO7* and *MISGS3* expression in 5-mm floral buds showed that, in the fully rescued lines, expression levels of the transgenes are 4~64-fold higher than those of the corresponding endogenous genes (Fig. S1). These results confirmed that *MIAGO7* and *MISGS3* are indeed the causal genes underlying *flayed1* and *flayed2*, respectively.

Knowing the causal genes and mutations allowed direct genotyping of a “*flayed1* x *flayed2*” F<sub>2</sub> population to identify *flayed1 flayed2* double mutants, which are phenotypically indistinguishable from the single mutants (Fig. 1D, F, G, H). This further indicates that *MIAGO7* and *MISGS3* function in the same genetic pathway in *Mimulus*, as expected.

**The *flayed1/2* Phenotypes Are Primarily Mediated Through the tasiRNA-ARF Pathway.** Because *AGO7* and *SGS3* are necessary components of the miR390-*TAS3*-ARF pathway (Fig. 3A), and the highly conserved, *TAS3*-derived tasiARFs are known to play a critical role in leaf polarity and lamina growth by repressing *ARF3/4* expression (33-41), we hypothesized that the *flayed1/2* phenotypes (e.g., reduced width of lateral organs) are primarily mediated through the tasiRNA-ARF pathway. This hypothesis makes three clear predictions: (i) The abundance of *TAS3*-derived small RNAs, including tasiARFs, should be much lower in the mutants compared to the wild-type; (ii) The *M. lewisii* orthologs of *ARF3/4* should be upregulated in the mutants; and, (iii) Artificial upregulation of the *M. lewisii* *ARF3/4* orthologs in the wild-type background should recapitulate the *flayed1/2* phenotypes.

To test the first prediction, we sequenced the total small RNA pool from young floral buds (5-mm) of the wild-type, *flayed1*, and *flayed2*. Like most other angiosperms, *M. lewisii* has two kinds of *TAS3* genes (each represented by only a single copy in the *M. lewisii* genome): *TAS3S* contains a single, centrally located tasiARF, whereas *TAS3L* contains two tandem tasiARFs (30; Fig. S2). No *TAS3S*-derived small RNAs were detected in any of the sequenced samples, suggesting that the *TAS3S* gene is not expressed. *TAS3L*-derived small RNAs were detected at the level of ~600 per million reads in the wild-type, but decreased >50-fold in both *flayed1* and *flayed2* (Fig. 3B). In particular, the tasiARFs were almost entirely absent from the mutant samples (Fig. 3B). These results confirmed the first prediction.

To test the second prediction, we first searched the *M. lewisii* genome for *ARF3/4* homologs and found a single ortholog for each of the two genes. Similar to *ARF3/4* in other species, both *MIARF3* and *MIARF4* have two binding sites with sequences complementary to tasiARF (Fig. 4A and B). qRT-PCR measurements in 5-mm floral



buds showed that in the single and double mutants, *MIARF3* was up-regulated by 1.7~2.5-fold and *MIARF4* was up-regulated by 2.7~3.7-fold (Fig. 4C). This moderate up-regulation of *ARF3/ARF4* in the *ago7* and *sgs3* mutant backgrounds is very similar to previous reports in *Arabidopsis* (Garcia et al., 2006; Hunter et al., 2006), supporting the role of tasiARF in fine-tuning *ARF3/4* expression level.

To test the third prediction, we transformed the wild-type with a tasiARF-insensitive version of *MIARF3* (*mMIARF3*) and *MIARF4* (*mMIARF4*) with several synonymous substitutions at the tasiARF binding sites (Fig. 4A and B), driven by the 35S promoter. We obtained seven independent *35S:mMIARF3* and 14 *35S:mMIARF4* lines. In each case, only two transgenic lines showed obvious phenotypes: their leaves are very similar to the *flayed1/2* mutants (i.e., narrower than the wild-type) and corollas are partially split (indicated by the red arrow heads in Fig. 4D and E). qRT-PCR experiments on 5-mm floral buds of the transgenic lines with even the strongest phenotypes showed only moderate overexpression of *MIARF3/4* relative to the wild-type (2~4-fold, Fig. S3A and B). Examination of two random *35S:mMIARF4* lines without obvious phenotypes showed no increase in expression level of *MIARF4* (Fig. S2C). The lack of *35S:mMIARF3/4* lines with strong transgene expression is in contrast to ectopic expression of *MIAGO7* and *MISGS3* (Fig. S1) as well as pigment-related transcription factors in *M. lewisii* (46, 47), where the same 35S promoter could readily drive transgene expression level >10-fold higher than that of the endogenous genes. One possible explanation for this observation is that transgenic lines with very strong *ARF3/4* expression in *M. lewisii* are seedling lethal, as implicated by similar experiments in tomato (37). Nevertheless, our results show that a moderate up-regulation of *MIARF3/4* can indeed fully recapitulate the leaf phenotype and partially recapitulate the flower phenotype of the *flayed1/2* mutants. Furthermore, a double transgenic line derived from a cross between the strongest *35S:mMIARF3* line and *35S:mMIARF4* line showed dramatic petal fusion defects (Fig. 4F), more closely resembling the *flayed1/2* mutants than the single transgenic lines. This indicates that *MIARF3* and *MIARF4* may act synergistically in regulating corolla tube formation. Taken together, our results from transgenic manipulation of the *MIARF3/4* expression levels suggest that the *flayed1/2* phenotypes



(narrow leaf and split corolla tube) are primarily mediated by the up-regulation of *MIARF3/4*.

**The tasiRNA-ARF Pathway Is Required for Preferential Lateral Expansion of the Bases of Petal Primordia and Coordinated Growth of Inter-primordial Regions.** To understand how malfunction of the tasiRNA-ARF pathway affects corolla tube formation in *M. lewisii*, we have studied floral organogenesis in the wild-type and the *flayed2* mutant using scanning electron microscopy. Like other species in the Lamiid clade (e.g., snapdragon, petunia, morning glory), *M. lewisii* petals are initiated as five separate primordia (Fig. 5A). Petal development lags behind stamens in the early stages (Fig. 5B and C), but by the time the corolla reaches ~0.5 mm in diameter (Fig. 5D), petal development progresses rapidly and soon the stamens are found enclosed in the corolla (Fig. 5E-H). The developmental stage from 0.3 to 0.4 mm (corolla diameter) is critical for corolla tube formation: during this stage, the bases of the petal primordia quickly expand laterally (to a conspicuously greater extent than the upper portion of the petal primordia; Fig. 5M), and the inter-primordial regions also grow coordinately, connecting the initially separate petal primordia. Floral organogenesis of *flayed2* is very similar to that of the wild-type at the early stages (before the corolla reaches 0.3 mm in diameter; Fig. 5I). However, during the critical period (0.3~0.4 mm), there is no preferential lateral expansion at the bases of the petal primordia, manifested as the truncate shape of the petal primordium base (Fig. 5N), in contrast to the semi-circle shape of the wild-type (Fig. 5M). Notably, growth of the inter-primordial regions is also arrested in *flayed2*, leading to a gap between two adjacent petal primordia (Fig. 5J-L and indicated by the asterisk in Fig. 5N).

Given that disruption of tasiRNA biogenesis and the consequent up-regulation of *ARF3/4* have been shown to cause reduced lamina growth of lateral organs in multiple plant species (36-38, 41), it is not surprising to observe reduced lateral expansion at the bases of the petal primordia in *flayed2* compared to the wild-type (Fig. 5M and N). But how does this relate to the arrest of *upward* growth of the inter-primordial regions?

In a series of careful anatomical studies of various taxa in the Asterid clade, Nishino (12-15) recognized that the “co-operation” between the marginal meristem

activities of the base of the petal primordia and the upward growth of the inter-primordial regions plays a pivotal role in corolla tube formation, although the nature of this “co-operation” was unclear. In light of this earlier insight, we interpreted the *flayed2* phenotype as follows: in the wild-type there is molecular signaling from the marginal meristematic cells at the bases of the petal primordia to the inter-primordial cells, stimulating the latter to grow upward coordinately (i.e., the nature of the “co-operation” is molecular signaling between the two regions). In the *flayed2* mutant, this molecular signaling is disrupted, causing a complete arrest of the upward growth of the inter-primordial regions. An obvious candidate for this putative signal is the phytohormone auxin, which is known to promote localized tissue outgrowth and meanwhile suppress organ boundary genes such as *CUP-SHAPED COTYLEDON 1 (CUC1)* and *CUC2* in *Arabidopsis* (48).

### **A Conceptual Model for the Genetic Control of Corolla Tube Formation:**

Two recent attempts of building a conceptual framework for floral organ fusion in general (7) or petal fusion in particular (8) both emphasized the genetic regulatory network underlying organ boundary formation and maintenance. The rationale for such emphasis was explicitly stated by Specht and Howarth (7): “*fusion as a process may more accurately be defined as a lack of organ separation*”. While these attempts represent an important step towards a mechanistic understanding of the developmental process of corolla tube formation, to some degree they have neglected the insight provided by earlier morphological and anatomical studies (i.e., the importance of the “co-operation” between the rapid lateral expansion of the petal primordium bases and the upward growth of the inter-primordial regions), and have not provided a logical integration of the sporadic reports of corolla tube mutants (23, 24, 49).

Building on the historical insight from anatomical studies and our molecular and phenotypic analyses of the tasiRNA-ARF pathway in *Mimulus*, we propose a new conceptual model that offers logical connections among the sporadic previous reports on the genetic control of corolla tube formation (Fig. 6). This model consists of three interconnected modules. At the heart of the model is the molecular signaling from the marginal meristematic cells at the base of the petal primordia to the inter-primordial cells, providing a molecular explanation for the “co-operation” between the petal primordia and

inter-primordial regions observed in anatomical studies. Upstream of this core module is the genetic regulatory network responsible for lateral expansion of the petal primordium base, which is required for initiation of the molecular signaling. Downstream of this core module lie the organ boundary genes that would suppress localized tissue growth if not repressed by the molecular signal coming from the petal primordia.

This model can readily explain the phenotypes of loss-of-function mutations in the morning glory *FEATHERED* gene and the petunia *MAEWEST* gene, which encode KANADI and WOX transcription factors, respectively (23, 24). Together with the tasiRNA-ARF pathway, these transcription factors are part of the genetic network regulating leaf adaxial-abaxial polarity and lamina growth (50-52). According to our model, disrupting this genetic regulatory network is expected to impede lateral expansion of the petal primordia, as in the *flayed2* mutant (Fig. 5N), and consequently break the signaling from the petal primordia to the inter-primordial cells, resulting in unfused petals. A less dramatic corolla tube phenotype was also observed in the snapdragon *graminifolia* mutant, with fusion defect restricted to the two dorsal petals (49). *GRAMINIFOLIA* encodes a YABBY transcription factor (49), another component of the leaf polarity/lamina growth genetic network. This example further highlights the importance of the “lamina growth” module in the model (Fig. 6).

Our model also provides a plausible explanation for the petal fusion defects observed when a chimeric repressor of AtTCP5 was over-expressed in the Japanese morning glory (25). Chimeric repressors of CIN-like TCP transcription factors, including TCP5 in Arabidopsis, are known to activate organ boundary genes such as *CUC1/2* (53). Ectopic activation of *CUC1/2* is expected to prevent the upward growth of the inter-primordial regions (i.e., boundary between adjacent petal primordia). Also consistent with the “organ boundary” module (Fig. 6) is a recent observation in snapdragon — the expression of the *CUC* ortholog, *CUPULIFORMIS*, is cleared from the inter-primordial regions shortly after petal initiation but later is reactivated in the sinuses between adjacent corolla lobes (54). Through computational modeling, Rebocho et al. (54) showed that this “gap” of *CUPULIFORMIS* expression (between the base of the corolla and the sinuses) is necessary for corolla tube formation.

In addition to explaining these previous observations, our model predicts that transgenic manipulation of other components of the leaf polarity/lamina growth network (e.g., *AS1*, *AS2*, *HD-ZIPIII*) (50-52) or ectopic expression of organ boundary genes (e.g., *CUC*, *ORGAN BOUNDARY1*, *JAGGED LATERAL ORGAN*) (55-57) in sympetalous species may also result in unfused corollas; it also predicts that misregulation of the molecular signaling, as proposed in the core module (Fig. 6), in transgenic or mutant plants should produce defective corolla tubes. If the putative signal is indeed auxin, regulation of polarized auxin transport within and between petal primordia will be key to understanding corolla tube formation. The availability of multiple corolla tube mutants, the ease of bulk segregant analysis to identify mutant genes, and the amenability of *Agrobacterium*-mediated *in planta* transformation make *Mimulus* a favorable system to test these predictions and to dissect the detailed molecular mechanisms and developmental process of corolla tube formation.

## Materials and Methods

**Plant Materials and Growth Conditions.** EMS mutagenesis was performed using the *Mimulus lewisii* Pursh inbred line LF10 as described (28). Another inbred line SL9 was used to generate the “*flayed* x SL9” F<sub>2</sub> populations. Plants were grown in the University of Connecticut research greenhouses under natural light supplemented with sodium vapor lamps, ensuring a 16-hr day length.

**Phenotypic Characterization.** To quantify phenotypic differences between the mutants and wild-type, we measured the widths of the dorsal, ventral, and lateral petals using a digital caliper. We also measured the lengths and widths of the fourth leaf (the largest leaf) of mature plants. To further evaluate whether the width difference is due to change in cell number, cell size or both, width of the abaxial epidermal cells of the dorsal petal lobe was measured following a previously described procedure (58).

**Genomic Analyses for Causal Gene Identification.** To identify causal genes underlying *flayed1* and *flayed2*, we employed a hybrid strategy that combines the advantages of bulk segregant analysis and genome comparisons between multiple EMS mutants, as

described previously (42). Briefly, for each mutant an F<sub>2</sub> population was produced by crossing the homozygous mutant (generated in the LF10 background) and the mapping line SL9. DNA samples from 96 F<sub>2</sub> segregants displaying the mutant phenotype (i.e., homozygous for the causal mutation) were pooled with equal representation. A small-insert library was then prepared for the pooled sample and was sequenced using an Illumina HiSeq 2000 platform at the University of North Carolina High Throughput Sequencing Facility. About 213 and 448 million 100-bp paired-end reads were generated for *flayed1* and *flayed2*, respectively.

The short reads were mapped to the LF10 genome assembly version 1.8 (<http://monkeyflower.uconn.edu/resources/>) using CLC Genomics Workbench 7.0 (Qiagen, Valencia, CA). The causal mutation should be: (i) homozygous for the pooled sample (i.e., 100% SNP frequency in the “F<sub>2</sub> reads – LF10 genome” alignment); and (ii) unique to each mutant (i.e., any shared 100% SNPs between mutants are most likely due to assembly error in the reference genome or non-specific mapping of repetitive sequences). After comparisons to the SNP profiles of previously published mutants, *guideless* (59), *rcp1* (47), *act1-D* (58), and *rcp2* (60), we narrowed the causal mutation to 39 and 19 candidate SNPs for *flayed1* and *flayed2*, respectively (Fig. S3).

**Small RNA Sequencing and Analyses.** For small RNA sequencing, total RNA was first extracted using the Spectrum Plant Total RNA Kit (Sigma-Aldrich) from 5-mm floral buds of LF10, *flayed1*, and *flayed2* (two biological replicates for each genotype). Small RNA libraries were then constructed using the TruSeq Small RNA Sample Preparation Kits (Illumina), with the total RNA as starting material. The libraries were sequenced on an Illumina HiSeq 2500 at the Delaware Biotechnology Institute (Newark, DE). Small RNA reads were quality-controlled and adaptor-trimmed before calculating tasiRNA abundance, as described in Xia et al. (30).

**Quantitative RT-PCR.** RNA extraction and cDNA synthesis were as previously described (29). cDNA samples were diluted 10-fold before quantitative reverse transcriptase PCR (qRT-PCR). All qRT-PCRs were performed using iQ SYBR Green Supermix (Bio-Rad) in a CFX96 Touch Real-Time PCR Detection System (Bio-Rad).

Samples were amplified for 40 cycles of 95 °C for 15 s and 60 °C for 30 s. Amplification efficiencies for each primer pair were determined using critical threshold values obtained from a dilution series (1:4, 1:8, 1:16, 1:32) of pooled cDNA. *MIUBC* was used as a reference gene as described (29). Primers used for qRT-PCR are listed in Table S4.

**Plasmid Construction and Plant Transformation.** To generate the *35S:MIAGO7* and *35S:MISGS3* constructs for the rescue experiments, we first amplified the full-length CDS of *MIAGO7* and *MISGS3* from the wild-type LF10 cDNA using the Phusion enzyme (NEB, Ipswich, MA). For each gene, the amplified fragment was cloned into the pENTR/D-TOPO vector (Invitrogen) and then a linear fragment containing the CDS flanked by the attL1 and attL2 sites was amplified using M13 primers. This linear fragment was subsequently recombined into the Gateway vector pEarleyGate 100 (61), which drives transgene expression by the CaMV 35S promoter. To generate the *35S:mMIARF3/4* constructs, CDS of insensitive forms of *MIARF3* (*mARF3*) and *MIARF4* (*mARF4*) that carries synonymous substitutions in the two tasiRNA recognition sites were synthesized by GenScript (NJ, USA) and then cloned into the pEarleyGate 100 destination vector as described for the *35S:MIAGO7* and *35S:MISGS3* constructs. All plasmids were verified by sequencing before being transformed into *Agrobacterum tumefaciens* strain GV3101 for subsequent plant transformation, as described in Yuan et al. (29). Primers used for plasmid construction and sequencing are listed in Table S5.

**Scanning Electron Microscopy.** Flower buds were fixed overnight in Formalin-Acetic-Alcohol (FAA) at 4°C, dehydrated for 30 min through a 50%, 60%, 70%, 95%, and 100% alcohol series. Samples were then critical-point dried, mounted, and sputter coated before being observed using a NOVA NanoSEM with Oxford EDX at 35 kV at UConn's Bioscience Electron Microscopy Laboratory.

# **Author Contributions**

B.D. designed the study, performed most of the phenotypic characterization and functional experiments, analyzed and interpreted the data, and drafted the manuscript.



R.X. and B.C.M. acquired and analyzed small RNA data. V.G. and P.K.D. acquired and interpreted the SEM images. J.M.S., L.E.S., and M.S. contributed to the transgenic experiments. Q.L. interpreted the data and illustrated the model (Figure 6). Y.W.Y. conceived and designed the project, analyzed and interpreted the data, and drafted the manuscript. All authors reviewed the manuscript.

## **Acknowledgements**

We are grateful to Dr. Toby Bradshaw (University of Washington) for encouragement and initial support for generating the bulk segregant data in his laboratory. We thank Clinton Morse, Matt Opel, and Adam Histen for plant care in the UConn EEB Research Greenhouses. This work was supported by the University of Connecticut start-up funds and an NSF grant (IOS-1558083) to Y-W.Y., and an NSF grant (IOS-1257869) to B.C.M.

## **Data Availability**

Short read data have been deposited in NCBI SRA (BioProject PRJNA423263); small RNA data have been deposited in NCBI GEO (GSE108530); annotated gene sequences have been deposited in GenBank (MG669632- MG669634 and MF084285).

## References

1. Endress PK (2011) Evolutionary diversification of the flowers in angiosperms. *Am J Bot* 98:370-396.
2. Schönenberger J, von Balthazar M (2013) Asterids. *Botanical Journal of the Linnean Society* 173:321-324.
3. Muchhala N (2006) Nectar bat stows huge tongue in its rib cage. *Nature* 444:701-702.
4. Hermann K, Kuhlemeier C (2011) The genetic architecture of natural variation in flower morphology. *Curr Opin Plant Biol* 14:60-65.
5. Paudel BR, *et al.* (2015) Out of africa: Evidence of the obligate mutualism between long corolla tubed plant and long-tongued fly in the himalayas. *Ecol. Evol.* 5(22):5240-5251.
6. Lagomarsino LP, Condamine FL, Antonelli A, Mulch A, Davis CC (2016) The abiotic and biotic drivers of rapid diversification in andean bellflowers (campanulaceae). *New Phytologist* 210:1430-1442.
7. Specht CD, Howarth DG (2015) Adaptation in flower form: A comparative evodevo approach. *New Phytologist* 206:74-90.
8. Zhong J, Preston JC (2015) Bridging the gaps: Evolution and development of perianth fusion. *New Phytologist* 208:330-335.
9. Boke NH (1948) Development of the perianth in *Vinca rosea* l. *Am. J. Bot.* 35:413-423.
10. Kaplan DR (1968) Structure and development of the perianth in *Downingia bacigalupii*. *Am. J. Bot.* 55:406-420.
11. Govil CM (1972) Morphological studies in the family Convolvulaceae. *Proceedings of the Indian Academy of Sciences - Section B* 75:271-282.
12. Nishino E (1976) Developmental anatomy of foliage leaves, bracts, calyx and corolla in *Pharbitis nil*. *The botanical magazine* 89:191-209.
13. Nishino E (1978) Corolla tube formation in four species of Solanaceae. *The botanical magazine* 91:263-277.
14. Nishino E (1983a) Corolla tube formation in the Primulaceae and Ericales. *The botanical magazine* 96:319-342.
15. Nishino E (1983b) Corolla tube formation in the Tubiflorae and Gentianales. *The botanical magazine* 96:223-243.
16. Erbar C (1991) Sympetaly—a systematic character. *Bot. Jb* 112:417-451.
17. Erbar C & Leins P (1996) Distribution of the character states “early sympetaly” and “late sympetaly” within the “sympetalae tetracycliae” and presumably allied groups\*. *Plant Biol.* 109:427-440.
18. Verbeke JA (1992) Fusion events during floral morphogenesis. *Annu. Rev. Plant Physiol. Plant Mol. Biol.* 43:583-598.
19. El Ottra JHL, Pirani JR, Endress PK (2013) Fusion within and between whorls of floral organs in Galipeinae (Rutaceae): Structural features and evolutionary implications. *Annals of botany* 111:821-837.
20. Singh V, Jain DK (1979) Floral organogenesis in *Antirrhinum majus* (Scrophulariaceae). *Proceedings of the Indian Academy of Sciences - Section B. Part2, Plant Sciences* 88:183-188.

- 485 21. Vincent CA, Coen ES (2004) A temporal and morphological framework for  
486 flower development in *Antirrhinum majus*. *Canadian Journal of Botany* 82:681-  
487 690.
- 488 22. Erbar C, Leins P (2011) Synopsis of some important, non-DNA character states in  
489 the asterids with special reference to sympetaly. *Plant Diversity and Evolution*  
490 129:93-123.
- 491 23. Iwasaki M, Nitasaka E (2006) The feathered gene is required for polarity  
492 establishment in lateral organs especially flowers of the japanese morning glory  
493 (*Ipomoea nil*). *Plant Mol. Biol.* 62:913-925.
- 494 24. Vandenbussche M, *et al.* (2009) Differential recruitment of wox transcription  
495 factors for lateral development and organ fusion in *Petunia* and *Arabidopsis*. *The*  
496 *Plant Cell* 21:2269-2283.
- 497 25. Ono M, *et al.* (2012) Morphological changes in *Ipomoea nil* using chimeric  
498 repressors of *Arabidopsis* TCP3 and TCP5. *Plant Biotechnology* 29:457-463.
- 499 26. Zhong J, Powell S, Preston JC (2016) Organ boundary NAC-domain transcription  
500 factors are implicated in the evolution of petal fusion. *Plant Biol.* 18:893-902.
- 501 27. Souer E, van Houwelingen A, Kloos D, Mol J, Koes R (1996) The No Apical  
502 Meristem gene of *Petunia* is required for pattern formation in embryos and  
503 flowers and is expressed at meristem and primordia boundaries. *Cell* 85:159-170.
- 504 28. Owen C, Bradshaw HD (2011) Induced mutations affecting pollinator choice in  
505 *Mimulus lewisii* (Phrymaceae). *Arthropod-Plant Interactions* 5:235-244.
- 506 29. Yuan Y-W, Sagawa JM, Young RC, Christensen BJ, Bradshaw HD (2013)  
507 Genetic dissection of a major anthocyanin QTL contributing to pollinator-  
508 mediated reproductive isolation between sister species of *Mimulus*. *Genetics*  
509 194:255-263.
- 510 30. Xia R, Xu J, Meyers BC (2017) The emergence, evolution, and diversification of  
511 the miR390-TAS3-ARF pathway in land plants. *Plant Cell*.
- 512 31. Allen E, Xie Z, Gustafson AM, Carrington JC (2005) microRNA-directed phasing  
513 during trans-acting siRNA biogenesis in plants. *Cell* 121:207-221.
- 514 32. Axtell MJ, Jan C, Rajagopalan R, Bartel DP (2006) A two-hit trigger for siRNA  
515 biogenesis in plants. *Cell* 127:565-577.
- 516 33. Hunter C, *et al.* (2006) Trans-acting siRNA-mediated repression of ETTIN and  
517 ARF4 regulates heteroblasty in *Arabidopsis*. *Development* 133:2973-2981.
- 518 34. Garcia D, Collier SA, Byrne ME, Martienssen RA (2006) Specification of leaf  
519 polarity in *Arabidopsis* via the trans-acting siRNA pathway. *Curr. Biol.* 16:933-  
520 938.
- 521 35. Fahlgren N, *et al.* (2006) Regulation of AUXIN RESPONSE FACTOR3 by TAS3  
522 ta-siRNA affects developmental timing and patterning in *Arabidopsis*. *Curr. Biol.*  
523 16:939-944.
- 524 36. Yan J, *et al.* (2010) The reduced leaflet genes encode key components of the  
525 trans-acting small interfering RNA pathway and regulate compound leaf and  
526 flower development in *Lotus japonicus*. *Plant Physiol* 152:797-807.
- 527 37. Yifhar T, *et al.* (2012) Failure of the tomato trans-acting short interfering RNA  
528 program to regulate AUXIN RESPONSE FACTOR3 and ARF4 underlies the  
529 wiry leaf syndrome. *The Plant Cell* 24:3575-3589.

- 530 38. Zhou C, *et al.* (2013) The trans-acting short interfering RNA3 pathway and no  
531 apical meristem antagonistically regulate leaf margin development and lateral  
532 organ separation, as revealed by analysis of an argonaute7/lobed leaflet1 mutant  
533 in *Medicago truncatula*. *The Plant Cell* 25:4845-4862.
- 534 39. Nogueira FT, Madi S, Chitwood DH, Juarez MT, Timmermans MC (2007) Two  
535 small regulatory RNAs establish opposing fates of a developmental axis. *Genes*  
536 *Dev* 21:750-755.
- 537 40. Nagasaki H, *et al.* (2007) The small interfering RNA production pathway is  
538 required for shoot meristem initiation in rice. *Proc. Natl. Acad. Sci. U. S. A.*  
539 104:14867-14871.
- 540 41. Douglas RN, *et al.* (2010) Ragged seedling2 encodes an ARGONAUTE7-like  
541 protein required for mediolateral expansion, but not dorsiventrality, of maize  
542 leaves. *The Plant Cell* 22:1441-1451.
- 543 42. LaFountain AM, *et al.* (2017) Molecular basis of overdominance at a flower color  
544 locus. *G3: Genes/Genomes/Genetics* 7:3947.
- 545 43. Peragine A, Yoshikawa M, Wu G, Albrecht HL, Poethig RS (2004) SGS3 and  
546 SGS2/SDE1/RDR6 are required for juvenile development and the production of  
547 trans-acting siRNAs in Arabidopsis. *Genes & Development* 18:2368-2379.
- 548 44. Yoshikawa M, Peragine A, Park MY, Poethig RS (2005) A pathway for the  
549 biogenesis of trans-acting siRNAs in Arabidopsis. *Genes Dev.* 19:2164-2175.
- 550 45. Chen X (2010) Small RNAs - secrets and surprises of the genome. *Plant J.*  
551 61:941-958.
- 552 46. Yuan Y-W, Sagawa JM, Frost L, Vela JP, Bradshaw HD (2014) Transcriptional  
553 control of floral anthocyanin pigmentation in monkeyflowers (*mimulus*). *New*  
554 *Phytologist* 204:1013-1027.
- 555 47. Sagawa JM, *et al.* (2015) An R2R3-MYB transcription factor regulates carotenoid  
556 pigmentation in *Mimulus lewisii* flowers. *New Phytologist*. 209: 1049-1057
- 557 48. Biltsborough GD, *et al.* (2011) Model for the regulation of *Arabidopsis thaliana*  
558 leaf margin development. *Proc. Natl. Acad. Sci. U. S. A.* 108:3424-3429.
- 559 49. Golz JF, Roccaro M, Kuzoff R, Hudson A (2004) Graminifolia promotes growth  
560 and polarity of *Antirrhinum* leaves. *Development* 131:3661-3670.
- 561 50. Nakata M, Okada K (2013) The leaf adaxial-abaxial boundary and lamina growth.  
562 *Plants* 2:174-202.
- 563 51. Tsukaya H (2013) Leaf development. *The Arabidopsis Book* 11:e0163.
- 564 52. Kuhlemeier C, Timmermans MCP (2016) The sussex signal: Insights into leaf  
565 dorsiventrality. *Development* 143:3230-3237.
- 566 53. Koyama T, Furutani M, Tasaka M, Ohme-Takagi M (2007) TCP transcription  
567 factors control the morphology of shoot lateral organs via negative regulation of  
568 the expression of boundary-specific genes in Arabidopsis. *The Plant Cell* 19:473-  
569 484.
- 570 54. Rebocho AB, Kennaway JR, Bangham JA, Coen E (2017) Formation and shaping  
571 of the *Antirrhinum* flower through modulation of the cup boundary gene. *Curr.*  
572 *Biol.* 27:2610-2622
- 573 55. Aida M, Ishida T, Fukaki H, Fujisawa H, Tasaka M (1997) Genes involved in  
574 organ separation in Arabidopsis: An analysis of the cup-shaped cotyledon mutant.  
575 *The Plant Cell* 9:841-857.

- 576 56. Borghi L, Bureau M, Simon R (2007) Arabidopsis JAGGED LATERAL  
577 ORGANS is expressed in boundaries and coordinates knox and pin activity. *Plant*  
578 *Cell* 19:1795-1808.
- 579 57. Cho E, Zambryski PC (2011) ORGAN BOUNDARY1 defines a gene expressed  
580 at the junction between the shoot apical meristem and lateral organs. *Proc. Natl.*  
581 *Acad. Sci. U. S. A.* 108:2154-2159.
- 582 58. Ding B, *et al.* (2017) A dominant-negative actin mutation alters corolla tube width  
583 and pollinator visitation in *Mimulus lewisii*. *New Phytologist* 213:1936-1944.
- 584 59. Yuan Y-W, Sagawa JM, Di Stilio VS, Bradshaw HD (2013) Bulk segregant  
585 analysis of an induced floral mutant identifies a MIXTA-like R2R3 MYB  
586 controlling nectar guide formation in *Mimulus lewisii*. *Genetics* 194:523-528.
- 587 60. Stanley LE, *et al.* (2017) A tetratricopeptide repeat protein regulates carotenoid  
588 biosynthesis and chromoplast development in monkeyflowers (*mimulus*). *bioRxiv*.  
589 doi: <http://dx.doi.org/10.1101/171249>
- 590 61. Earley KW, *et al.* (2006) Gateway-compatible vectors for plant functional  
591 genomics and proteomics. *Plant J* 45:616-629.



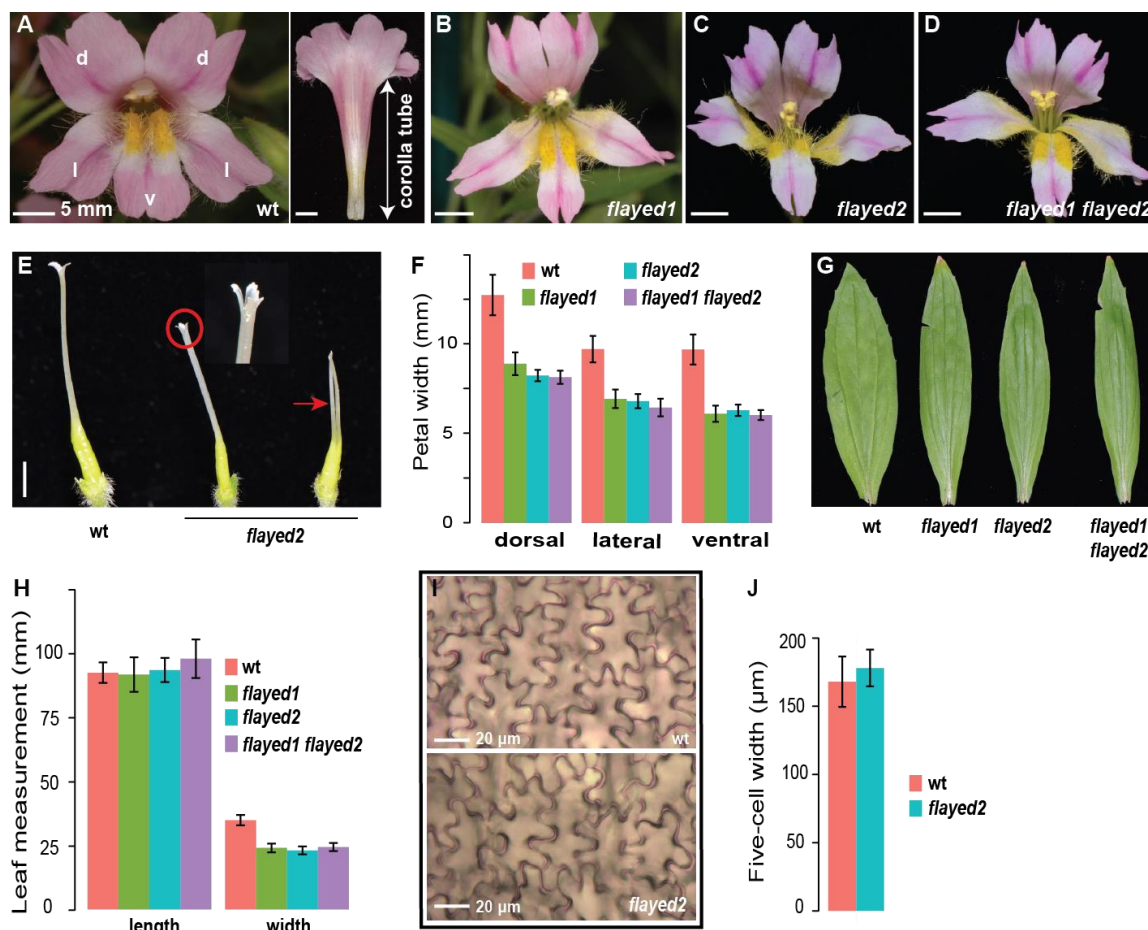

**Fig. 1.** Phenotypic characterization of the *flayed* mutants. (A) Front and back view of the *M. lewisii* (inbred line LF10) wild-type corolla. d: dorsal; l: lateral; v: ventral. (B-D) Front view of the corolla of *flayed1*, *flayed2*, and the double mutant. (E) Pistil of the wild-type (wt) and *flayed2*. The pistil phenotype of *flayed1* and the double mutant is the same as that of *flayed2*. (F) Quantitative comparison of petal width in wt (n = 18), *flayed1* (n = 10), *flayed2* (n = 12), and the double mutant (n = 12). Detailed measurement data are presented in Table S1. (G) Overall shape of the fourth leaf (the largest leaf) of mature plants. (H) Quantitative comparison of length and width of the fourth leaf, with the same sample sizes as in (F). (I) Abaxial epidermal cells of dorsal petal lobes. (J) Width of five contiguous abaxial epidermal cells of the dorsal petal lobes in the wt (n = 15) and *flayed2* (n = 15). Error bars in (F), (H), and (J) are 1 SD.



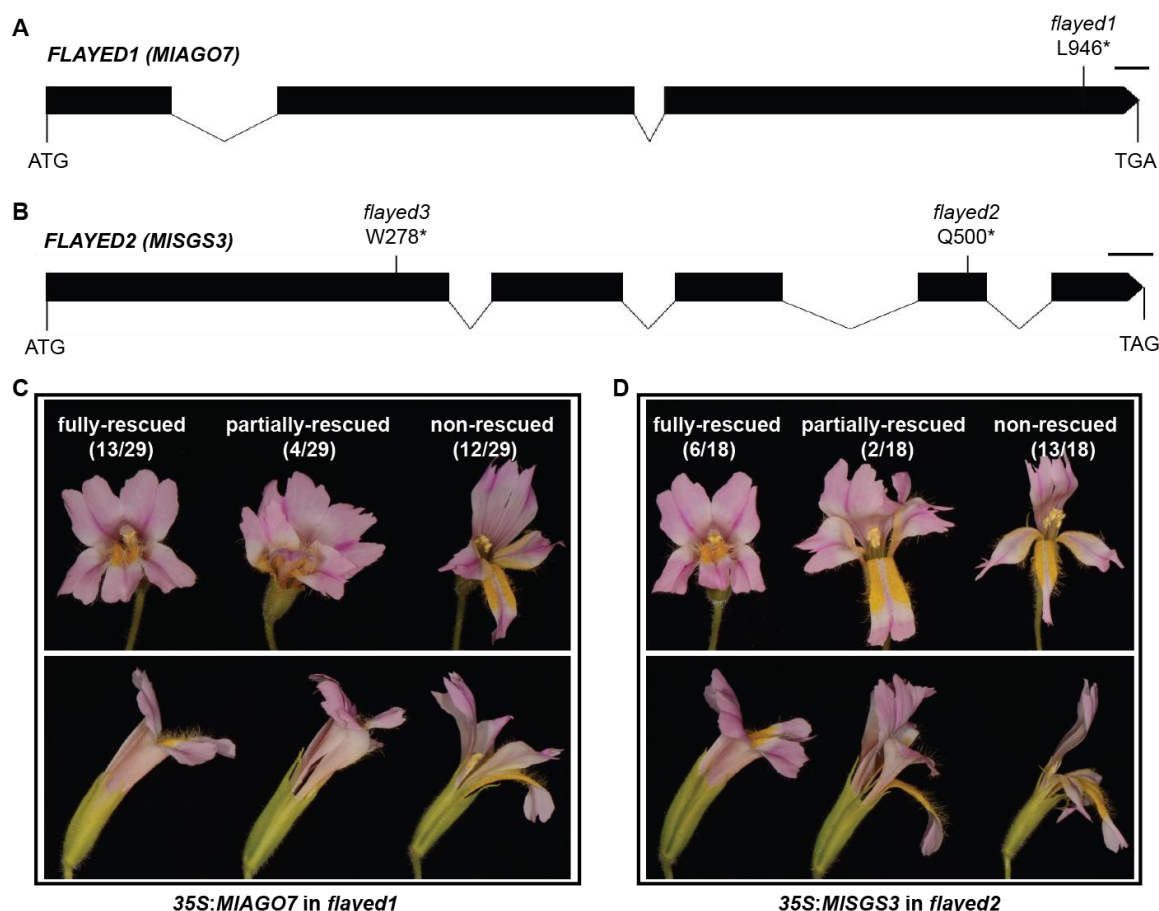

**Fig. 2.** *FLAYED1* and *FLAYED2* encode the orthologs of Arabidopsis AGO7 and SGS3, respectively. (A and B) Schematics of *MIAGO7* and *MISGS3* gene structure, with causal mutations indicated. Black box: coding DNA; Line: Intron. Scale bars are 100 bp. (C and D) Flower phenotypes of *35S:MIAGO7* and *35S:MISGS3* transgenics in the *flayed1* and *flayed2* mutant background, respectively (top: front view; bottom: side view). The proportion of fully-rescued, partially-rescued, and non-rescued lines are shown in the parentheses.

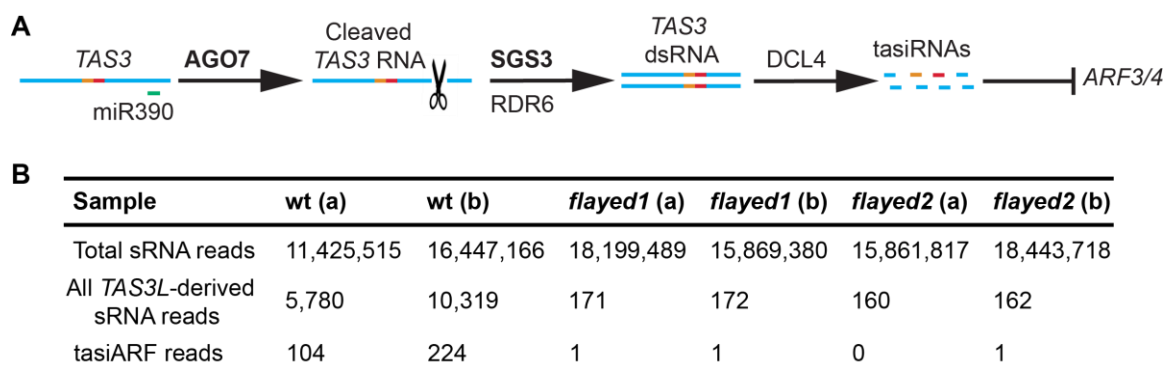

**Fig. 3.** Small RNA analysis. (A) Schematic of the miR390-*TAS3*-*ARF* pathway. The orange and red lines represent the two tandem tasiARFs (see Fig. S2 for detailed annotations). (B) Small RNA counts in the wild-type (wt), *flayed1*, and *flayed2*. Two biological replicates were sequenced for each genotype.

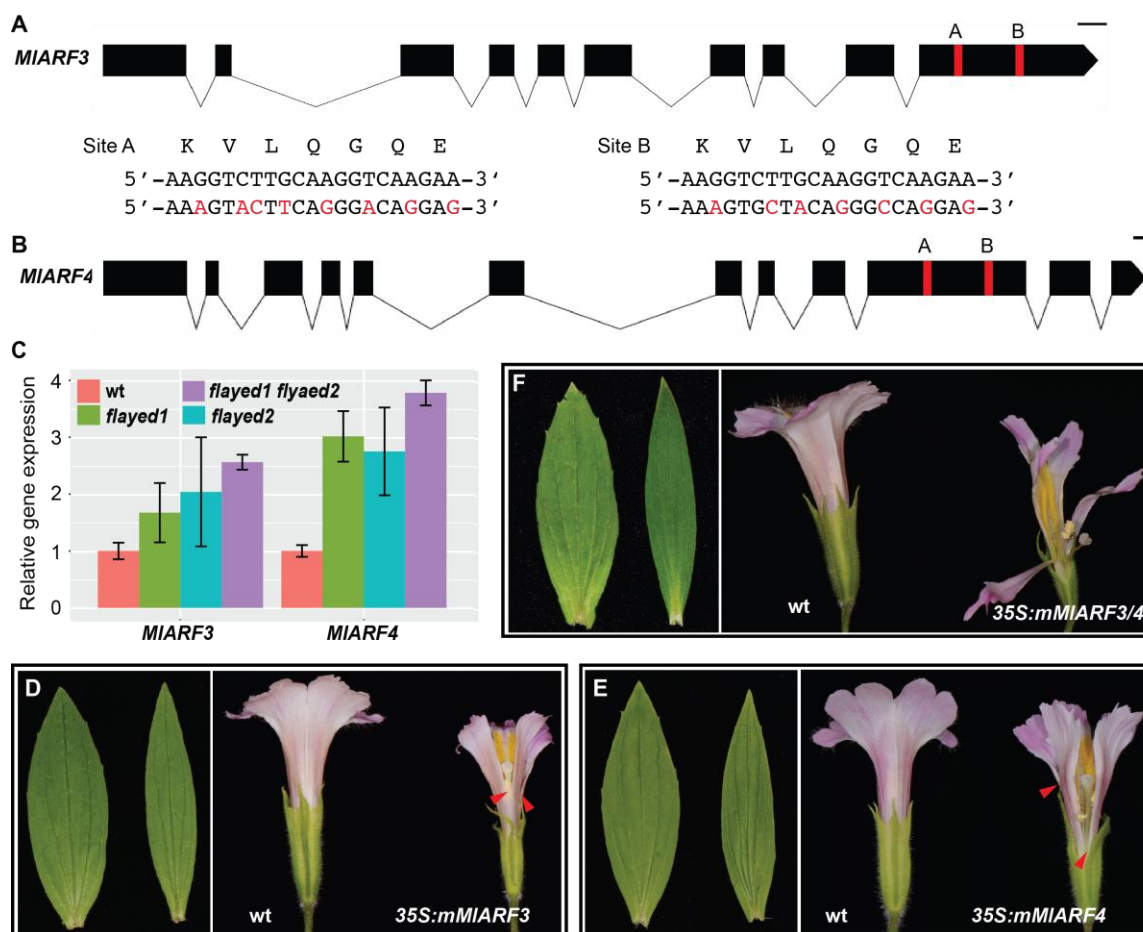

**Fig. 4.** The *flayed1/2* phenotypes are primarily mediated through up-regulation of *MIARF3/4*. (A and B) Schematics of *MIARF3* and *MIARF4* gene structure. Red bar: tasiARF binding site. Scale bars are 100 bp. The nucleotides highlighted in red are synonymous substitutions at the two tasiRNA binding sites that were introduced in the *35S:mMIARF3* and *35S:mMIARF4* constructs to circumvent tasiRNA repression. (C) Relative transcript level of *MIARF3* and *MIARF4* in 5-mm floral buds as determined by qRT-PCR. *MIUBC* was used as the reference gene. Error bars represent 1 SD from three biological replicates. (D-F) Leaf and flower phenotypes of strongest *35S:mMIARF3* (D), *35S:mMIARF4* (E), and double transgenic line (F). Left: wt; right: transgenic line. The red arrow heads indicate points of petal separation.

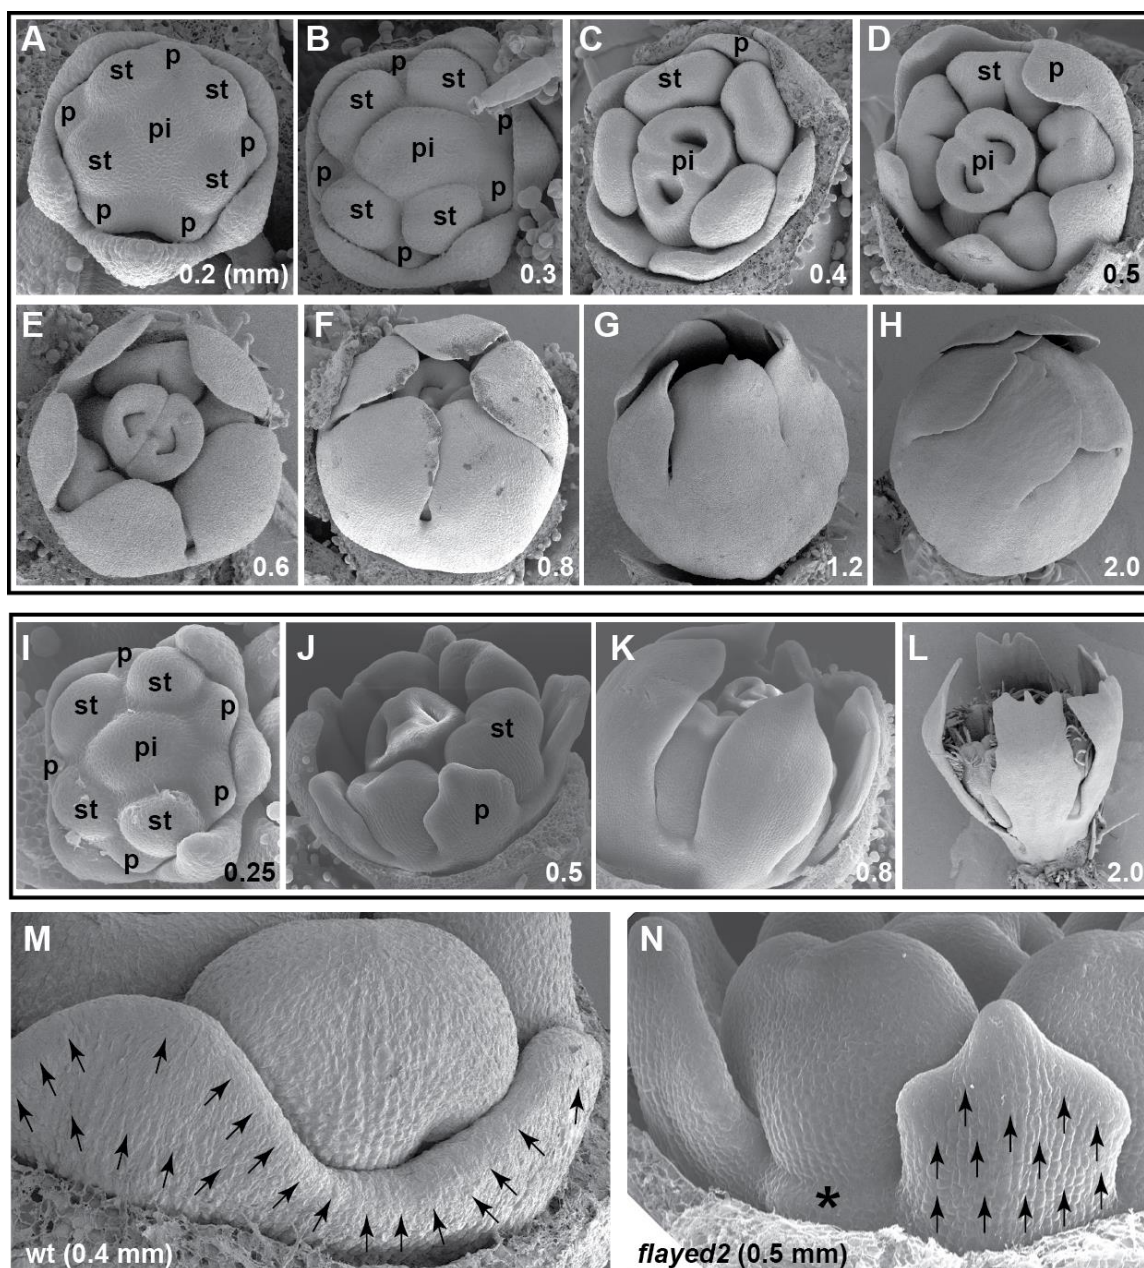

**Fig. 5.** Scanning electron micrographs of floral development. (A-H) *M. lewisii* wild-type LF10. The developmental stages are marked on the bottom right of each image by the diameter (in mm) of the corolla. From 0.4 mm onward, sepals were removed to show the petals. (I-L) *flayed2*. (M and N) Detailed view of two adjacent petal primordia and the inter-primordial region in the wt (M) and *flayed2* (N). Arrows indicate growth directions, and the asterisk in (N) marks the arrested inter-primordial region. p = petal; st = stamen; pi = pistil.



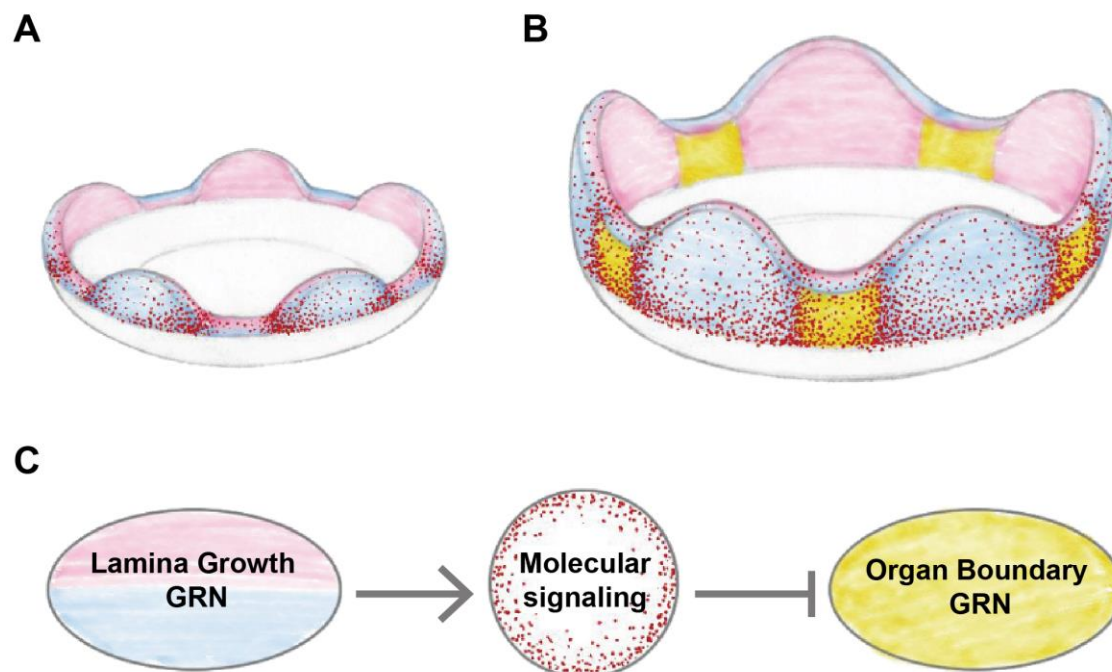

**Fig. 6.** A conceptual model for the developmental genetic control of corolla tube formation in *Mimulus lewisii*. (A) Separate petal primordia at 0.3-mm (corolla diameter) stage, when the hypothetical molecular signal (indicated by the red dots) starts moving from the petal primordia to the inter-primordial regions. The pink and blue color indicates the adaxial and abaxial side of the petal, respectively. (B) The molecular signal coming from the petal primordia stimulates coordinated upward growth of the inter-primordia regions (marked by the yellow color), resulting in congenital fusion of the petal primordia by the 0.4-mm (corolla diameter) stage. (C) Relationships among the three modules. GRN: Genetic Regulatory Network.

# Supporting Information

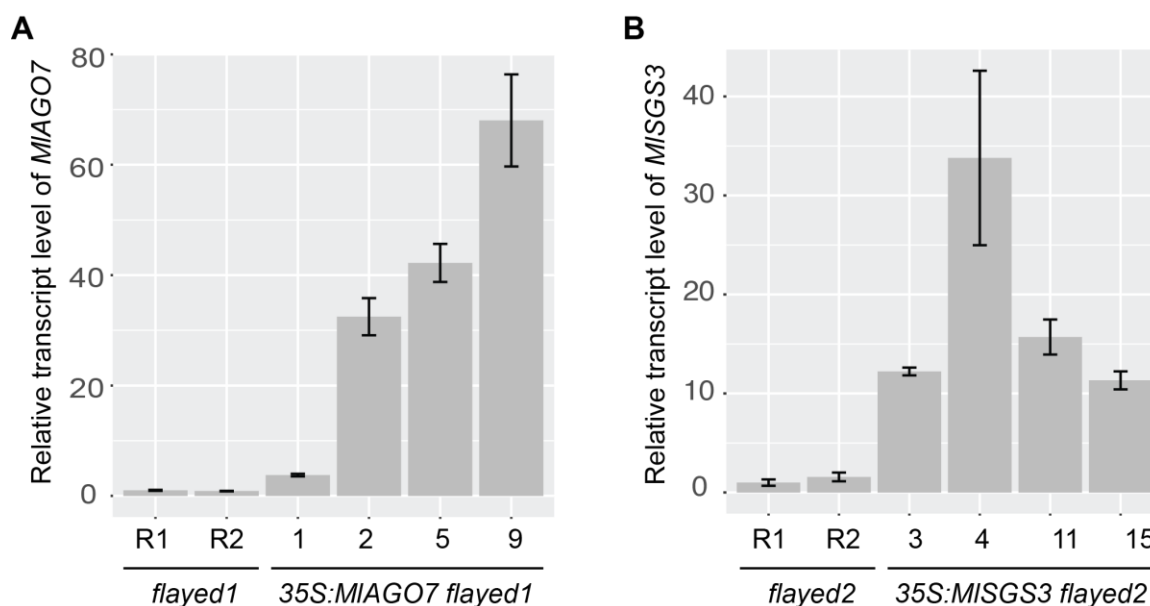

**Fig. S1.** Relative transcript level of *MIAGO7* (A) and *MISGS3* (B) in 5-mm floral buds of four representative, fully rescued over-expression lines compared to the corresponding mutant backgrounds, as determined by qRT-PCR. R1 and R2 represent two biological replicates. *MIUBC* was used as the reference gene. Error bars represent 1 SD from three technical replicates.



**A**

```

5' -AGGCGAUGAAUUCGACGAGACCUUCCGAUUUUAUGGAUGCAUCAACGCAAACAUCACGACCGAGGCC
  CACAAACGGCGGAAGCUUUGAUCGAGAAAGAGAAAAUCCCGUUGACGAUUCUACGACGACGAUGAACGAU
  GUUGUGAUGCAAGUGGUGGUUUCGUGUAGUUUAGUUGGGUGCUAUCCUACCUGAGCUUUUUUACUCU
                                     3' -CCGCGAUAGGGAGGACUCGAA-5'
UUUUUUUUCUUCGUUAAUUUUUUCUUUCGAUUUUUUGACAUGUUGCCUUUUGUUUUUGUCCAAUCCCGUGU
      tasiARF (D8)                tasiARF (D7)
CUUCUUGACCUUGUAAGACCUUUUCUUGACCUUGUAAGACCCCUGUCUUGUGGUCGCAUUCUGUUUUUC
CAUCUCGUGUUGGAUGCCACAUAUCUCUUUCUGAUGUUGGAUUAUCCCUUCUCUUUCUUCGUUCCCG
UCCAACUCACGUUCUCCUUCUUGUCUAUCCUCCUGAGCUAUUCCGAUCUUAGUGCUGCUAAUUAUUAG
                                     3' -CCGCGAUAGGGAGGACUCGAA-5'
UGCAUUGAGCAUAAUUAAGAUUAUAGUACCUUAGCAUUUUAUUUAUAGGGUCUUUAAUUUCAUUUUUUU
UUUUGUUUGAUGUCUUGAGCAUUUUAUAGAGAAGAUUAUAGGGUUAUUAUUUACAAACAUAUUAUUGAU
UGUAAUUAAUUAAGCCAAAAUAGAAUAGGGUGUGGGAUAUACAGAGGCCCUCAAUUUUUUUGUUGUUUU
AUAUGUAAUUGCUGGGUGAUGAAAAAGGUAGUAUGAGAGAAUAAUUAUUCUUGCACGCAGUUUUUCCU
UUGUUUUUCUCGUGACUGCUUUCAGUACAACUCUUAUUUAUA-3'

```

**B**

```

5' -AAGGUCUUGCAAGGUCAAGAA-3' ARF3/4      5' -AAGGUCUUGCAAGGUCAAGAA-3' ARF3/4
  ||||| ||| ||||| ||||| ||||| ||||| |||||  ||||| ||| ||||| ||||| ||||| |||||
3' -UUCAGAAUGUCCAGUUCU-5' tasiARF (D8)  3' -CCCAGAAUGUCCAGUUCU-5' tasiARF (D7)

```

**C**

```

5' -CACAGCAUAUCCCAAAUUAUCAGUCAGUUCUCUCUUAUGUCUGUCUUUUCUAUCUCUUCUUCUUCUUC
  UCAUCCUCAGUACUCUCACACAAGACUUCUUUCCACUGUCCGAUCCUUGUAAAACCAUGGAACUAUACG
  AGGUCAACAAUUAUGCAUGGUUUGUGGAGAUUCUUCGGUGAAAAGAUACGUCGACGCUAUCAGAAGUU
  UACGGGAUGAAUUUAACGACAAAAUUCUAAGGAUUCGGGCUAUCCUACUGAGCUUUUUAAAGUUUUU
                                     3' -CCGCGAUAGGGAGGACUCGAA-5'
UUCUUUUUAUUUUUAUGUUUUUUUCUUGACCUUGCAAGACUUAUAUUCGUUUCAUUUUAGUUUUACU
CAGUUGCAGCGAUUUUAUUUAUUUUUCGUUUUUUUGUUAUCUCGUUCAAACCUCUCAUCUUCUUCG
UGUUUAGCUAUUCCUUCUGAGCUUAAUUAUGGGUUCGUUUGUUAAGCUUCAAUUAUUGUACAAG
  ||||| ||| ||||| ||||| ||||| ||||| |||||  ||||| ||| ||||| ||||| ||||| |||||
3' -CCGCGAUAGGGAGGACUCGAA-5'
UAUUAUUAUUUUUCUUUUGCUCUUUUUUUAUCCAUG-3'

```

**Fig. S2.** Annotation of the *TAS3* transcripts in *Mimulus lewisii*. (A) *TAS3L*. The two miR390 binding sites are indicated by the green boxes; the tandem tasiARFs are highlighted in orange and red fonts. (B) Sequence complementarity between the two tasiARFs and the tasiARF-binding sites of *MIARF3/4*. (C) *TAS3S*. Highlighted are the miR390 binding sites and the single tasiARF sequence.

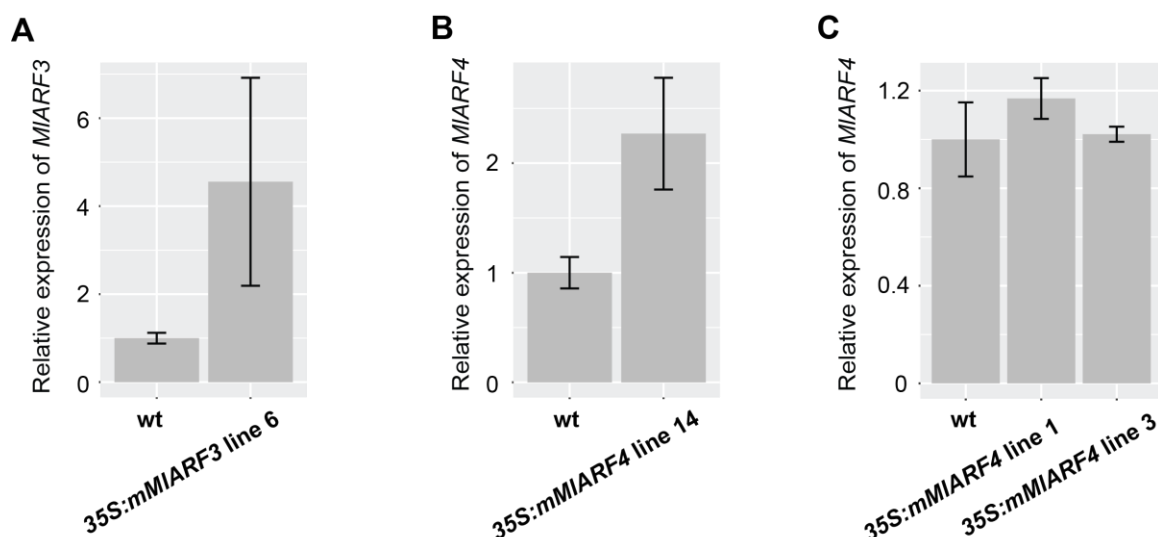

**Fig. S3.** Relative transcript level of *MIARF3/4* in 5-mm floral buds as determined by qRT-PCR. (A) *MIARF3* in the *35S:mMIARF3* line with the strongest phenotype. (B) *MIARF4* in the *35S:mMIARF4* line with the strongest phenotype. (C) *MIARF4* in two *35S:mMIARF4* transgenic lines without any obvious phenotypes. *MIUBC* was used as the reference gene. Error bars represent 1 SD from three biological replicates.

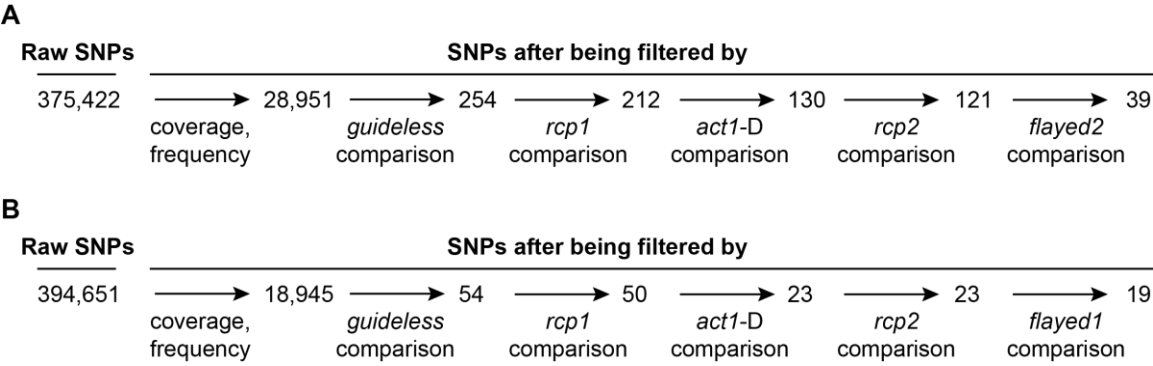

**Fig. S4.** SNP profile comparison between different EMS mutants. (A) Comparison between *flayed1* and other mutants. (B) comparison between *flayed2* and other mutants.

**Table S1.** Measurements of width (mm) of the dorsal, lateral and ventral petal, and the length (mm) and width (mm) of the fourth leaf in *Mimulus lewisii* wild-type LF10 (n = 18), *flayed1* (n = 10), *flayed2* (n = 12) and the double mutant (n = 12) (mean±SD).

| Trait               | Wild-type  | <i>flayed1</i> | <i>flayed2</i> | <i>flayed1 flayed2</i> |
|---------------------|------------|----------------|----------------|------------------------|
| Dorsal Petal Width  | 12.71±1.13 | 8.88±0.63      | 8.23±0.32      | 8.13±0.37              |
| Lateral Petal Width | 9.7±0.73   | 6.92±0.51      | 6.80±0.39      | 6.44±0.49              |
| Ventral Petal Width | 9.68±0.84  | 6.1±0.45       | 6.29±0.32      | 6.02±0.28              |
| Leaf Width          | 34.78±2.02 | 24±1.7         | 23±1.53        | 24.33±1.56             |
| Leaf Length         | 92.31±4.02 | 91.6±6.74      | 93.33±4.70     | 97.75±7.5              |

**Table S2.** *FLAYED1* Candidate SNPs from the mutant genome comparisons. The SNP highlighted in bold is the causal mutation.

| LF10g_v1.8 scaffolds | Position     | Wild-type | Mutant   | Annotation                                                                                    |
|----------------------|--------------|-----------|----------|-----------------------------------------------------------------------------------------------|
| scaffold11           | 1859         | C         | T        | Non-coding, repetitive sequence                                                               |
| scaffold24           | 263418       | G         | T        | Non-coding, repetitive sequence                                                               |
| scaffold8            | 166102       | T         | A        | Non-coding, repetitive sequence                                                               |
| scaffold52           | 174572       | T         | A        | Non-coding sequence                                                                           |
| scaffold52           | 288610       | T         | A        | Non-coding, repetitive sequence                                                               |
| scaffold203          | 238265       | A         | T        | Non-coding sequence                                                                           |
| scaffold215          | 16351        | G         | A        | Non-coding intergenic sequence                                                                |
| scaffold215          | 119479       | C         | T        | Non-coding, repetitive sequence                                                               |
| scaffold215          | 252167       | C         | T        | Non-coding, repetitive sequence                                                               |
| scaffold305          | 192826       | T         | C        | Non-synonymous substitution at a non-conserved site of a mTERF domain-containing protein gene |
| scaffold319          | 280772       | T         | A        | Non-coding, repetitive sequence                                                               |
| scaffold445          | 97914        | T         | A        | Non-coding, repetitive sequence                                                               |
| scaffold462          | 69970        | G         | A        | Non-coding, repetitive sequence                                                               |
| scaffold426          | 374050       | A         | G        | Non-coding, repetitive sequence                                                               |
| scaffold450          | 155167       | G         | A        | Non-coding sequence                                                                           |
| scaffold399          | 668492       | T         | C        | Non-coding, repetitive sequence                                                               |
| scaffold668          | 153018       | G         | A        | LTR-retrotransposon                                                                           |
| scaffold683          | 11631        | C         | T        | Non-synonymous substitution at a non-conserved site of a PECTINESTERASE-related gene          |
| scaffold564          | 125017       | A         | G        | Intron of a SET-domain protein gene                                                           |
| scaffold564          | 334366       | T         | C        | Non-coding sequence                                                                           |
| scaffold836          | 462          | G         | A        | Non-coding, repetitive sequence                                                               |
| scaffold965          | 79518        | C         | T        | Non-coding sequence                                                                           |
| scaffold1145         | 6875         | C         | T        | Non-coding, repetitive sequence                                                               |
| scaffold1195         | 85177        | G         | A        | Non-coding, repetitive sequence                                                               |
| scaffold1287         | 103555       | G         | A        | Non-coding sequence                                                                           |
| scaffold1294         | 57177        | G         | A        | Non-coding, repetitive sequence                                                               |
| scaffold1315         | 55585        | G         | T        | Non-coding, repetitive sequence                                                               |
| <b>scaffold1584</b>  | <b>15734</b> | <b>A</b>  | <b>T</b> | <b>Premature stop codon in AGO7</b>                                                           |

|              |        |   |   |                                                               |
|--------------|--------|---|---|---------------------------------------------------------------|
| scaffold1617 | 13975  | A | G | Non-coding, repetitive sequence                               |
| scaffold1605 | 96689  | C | T | Non-coding, repetitive sequence                               |
| scaffold1734 | 37530  | T | G | Non-coding, repetitive sequence                               |
| scaffold1746 | 13707  | A | G | Non-coding, repetitive sequence                               |
| scaffold1789 | 71366  | C | T | Non-coding, repetitive sequence                               |
| scaffold1885 | 24901  | C | T | 3'UTR of <i>Structural Maintenance of Chromosome 3 (SMC3)</i> |
| scaffold1852 | 183687 | G | A | Non-coding, repetitive sequence                               |
| scaffold2275 | 186058 | C | T | Non-coding, repetitive sequence                               |
| scaffold2713 | 7833   | G | A | Non-coding, repetitive sequence                               |
| scaffold3491 | 9533   | C | T | Non-coding, repetitive sequence                               |

696  
697



**Table S3.** *FLAYED2* Candidate SNPs from the mutant genome comparisons. The SNP highlighted in bold is the causal mutation.

| LF10g_v1.8 scaffolds | Position     | Wild-type | Mutant   | Annotation                                                                                                   |
|----------------------|--------------|-----------|----------|--------------------------------------------------------------------------------------------------------------|
| scaffold68           | 9337         | T         | C        | Non-coding, repetitive sequence                                                                              |
| <b>scaffold156</b>   | <b>87555</b> | <b>G</b>  | <b>A</b> | <b>Premature stop codon in <i>SGS3</i></b>                                                                   |
| scaffold283          | 103550       | T         | A        | Non-coding, repetitive sequence                                                                              |
| scaffold249          | 427385       | C         | T        | LTR-retrotransposon                                                                                          |
| scaffold432          | 106338       | G         | A        | Non-coding, repetitive sequence                                                                              |
| scaffold432          | 202697       | A         | T        | Non-coding, repetitive sequence                                                                              |
| scaffold427          | 215729       | G         | A        | Non-coding, repetitive sequence                                                                              |
| scaffold925          | 11368        | C         | T        | Non-coding, repetitive sequence                                                                              |
| scaffold1368         | 69701        | G         | A        | Non-coding, repetitive sequence                                                                              |
| scaffold1418         | 15654        | T         | A        | Non-synonymous substitution at a non-conserved site of a calcium-dependent phospholipid-binding protein gene |
| scaffold1706         | 34503        | C         | T        | Intron of a serine/threonine protein kinase gene                                                             |
| scaffold1884         | 10588        | G         | A        | Non-coding, repetitive sequence                                                                              |
| scaffold1977         | 48277        | T         | A        | Non-coding, repetitive sequence                                                                              |
| scaffold1987         | 42893        | A         | G        | Non-coding sequence                                                                                          |
| scaffold1897         | 127158       | A         | G        | Non-coding, repetitive sequence                                                                              |
| scaffold2025         | 129655       | T         | A        | Non-coding intergenic sequence                                                                               |
| scaffold2466         | 11082        | T         | A        | Mutator-like transposon                                                                                      |
| scaffold2643         | 10512        | C         | T        | LTR-retrotransposon                                                                                          |
| scaffold2984         | 28110        | C         | T        | Mutator-like transposon                                                                                      |

**Table S4.** qRT-PCR Primers used in this study.

| Gene          | Forward (5'-3')         | Reverse (5'-3')          |
|---------------|-------------------------|--------------------------|
| <i>MIAGO7</i> | CGAGAATGAGGTCGCAAACCTCA | AGCTTCAGCTTCGGAGGCTGAA   |
| <i>MISGS3</i> | GGACGACATTGATGACACTGA   | AGGCTCGTTTATCTGCTCAACA   |
| <i>MIARF3</i> | CGCAGCTCAGATATGCATGGAA  | TGTCTCTTACAGCATGCCTGTC   |
| <i>MIARF4</i> | GCGTGTTGTACACTGATAGCGA  | CTTTGTGTTCGTCGCTATTCATCC |
| <i>MIUBC</i>  | GGCTTGGA CTCTGCAGTCTGT  | TCTTCGGCATGGCAGCAAGTC    |

**Table S5.** Primers used for plasmid constructions and sequence verification. The sequence highlighted in red (“cacc”) is the 4-bp sequence necessary for pENTR/D-TOPO cloning.

| Primer              | Sequence (5'-3')                            | Usage                             |
|---------------------|---------------------------------------------|-----------------------------------|
| <i>MIAGO7_cdsF</i>  | <b>cacc</b> ATGGAAGAAGAAGAAGAAGGAAAG<br>TCC | Plasmid construction & Sequencing |
| <i>MIAGO7_SP1F</i>  | CCTCTGCATCTCACAGTTGCTC                      | Sequencing                        |
| <i>MIAGO7_SP1R</i>  | GAGCAACTGTGAGATGCAGAGG                      | Sequencing                        |
| <i>MIAGO7_SP2F</i>  | GCCGAAAGAACGAAGGGCTATTA                     | Sequencing                        |
| <i>MIAGO7_SP2R</i>  | ATTACTGGGCGGACTAGCTACT                      | Sequencing                        |
| <i>MIAGO7_Seq2F</i> | TCCGGAAGATCATTCTACTCGA                      | Sequencing                        |
| <i>MIAGO7_Seq2R</i> | TCGAGTAGAATGATCTTCCGGA                      | Sequencing                        |
| <i>MIAGO7_SP3F1</i> | CGAGAATGAGGTCGAAACTCA                       | Sequencing                        |
| <i>MIAGO7_SP3R1</i> | AGCTTCAGCTTCGGAGGCTGAA                      | Sequencing                        |
| <i>MIAGO7_Seq3F</i> | TTCTCGCAATTTGGCTCTCA                        | Sequencing                        |
| <i>MIAGO7_Seq3R</i> | TGAGAGCCAAATTCGCGAGAA                       | Sequencing                        |
| <i>MIAGO7_cdsR</i>  | GCAATAAAACATCAACTTGCTAATATTC                | Plasmid construction & Sequencing |
| <i>MISGS3_cdsF</i>  | <b>cacc</b> ATGAGCTCAGGAAAAGGGATTGC         | Plasmid construction & Sequencing |
| <i>MISGS3_seqF1</i> | GGACGACATTGATGACACTGA                       | Sequencing                        |
| <i>MISGS3_seqR1</i> | AGGCTCGTTTATCTGCTCAACA                      | Sequencing                        |
| <i>MISGS3_seqF2</i> | CAGCAGTAGGATATGTAGAAGC                      | Sequencing                        |
| <i>MISGS3_seqR2</i> | ATACGACCGCATCTCATACTTC                      | Sequencing                        |
| <i>MISGS3_cdsR</i>  | GTTGGATTTAGTTGGAGCGTAC                      | Plasmid construction & Sequencing |
| <i>MIARF3_cdsF</i>  | <b>cacc</b> ATGATGTTTCGGGTAAATCGATT         | Plasmid construction & Sequencing |
| <i>MIARF3_2F</i>    | GTTTCGCTAGTTCCAGATCAGCA                     | Sequencing                        |
| <i>MIARF3_3R</i>    | GGAGTCATAGACTTTCCCATGC                      | Sequencing                        |
| <i>MIARF3_10F</i>   | CGCAGCTCAGATATGCATGGAA                      | Sequencing                        |
| <i>MIARF3_10R</i>   | TGTCTCTTACAGCATGCCTGTC                      | Sequencing                        |
| <i>MIARF3_cdsR</i>  | CTACAGTGCTATATCAAGAAGCCT                    | Plasmid construction & Sequencing |
| <i>MIARF4_cdsF</i>  | <b>cacc</b> ATGGGAATTATTGATCTGAATC          | Plasmid construction & Sequencing |
| <i>MIARF4_1F</i>    | TCCTCTGCTCTAACGTTTACTC                      | Sequencing                        |

|                    |                          |                                   |
|--------------------|--------------------------|-----------------------------------|
| <i>MIARF4_2F</i>   | TACACTCAGCTGAACCTGCTTC   | Sequencing                        |
| <i>MIARF4_2R</i>   | CTCTGATAGAGGAAGCAGGTTC   | Sequencing                        |
| <i>MIARF4_3R</i>   | TGAAGTCGACTTTGCAGGTGTA   | Sequencing                        |
| <i>MIARF4_6F</i>   | CAGAGTTCTTACCACAATGTCC   | Sequencing                        |
| <i>MIARF4_7R</i>   | TCTCAATCCAACAGGTATGCAG   | Sequencing                        |
| <i>MIARF4_9F</i>   | CATCTCTGAGCATCCAATCGTC   | Sequencing                        |
| <i>MIARF4_10R</i>  | AGATGTCCTGTCCGAAATCAGT   | Sequencing                        |
| <i>MIARF4_cdsR</i> | TTAATCGGGCTGGCCACAGAAGAT | Plasmid construction & Sequencing |

710
